# Supplementary material for: Electrospun porous CuCo2O4 nanowire network electrode for asymmetric supercapacitors
Source: Royal Society of Chemistry journal article supplement (doi:10.1039/c5ra21170k), 2015-01-01
Supplement: c5ra21170k1.pdf [file c5ra21170k1.pdf]

## Supporting Information

### Electrospun porous $\text{CuCo}_2\text{O}_4$ nanowire networks electrode for asymmetric supercapacitor

Qiufan Wang, Di Chen\*, and Daohong Zhang\*

The mass ratio of positive to negative electrodes was evaluated through using the following equation to maintain a charge balance  $Q^+=Q^-$  in order to fabricate the device

$$m^+/m^- = C^- \times E^- / (C^+ \times E^+)$$

In which Q, m, C, E are the charge, mass, specific capacitance, and potential windows, respectively. Accordingly, the optimal positive to negative mass ratio was determined to be 0.65 for this asymmetric capacitor.

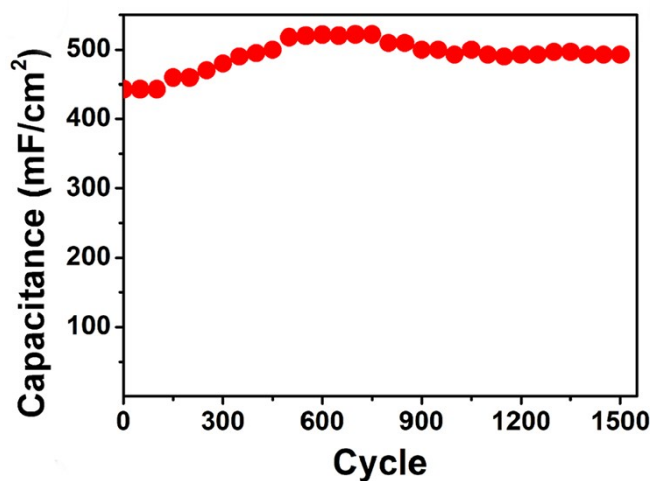

**Figure S1.** The cycling performance of  $\text{CuCo}_2\text{O}_4$  network electrode at a current density of  $1 \text{ mA/cm}^2$ .

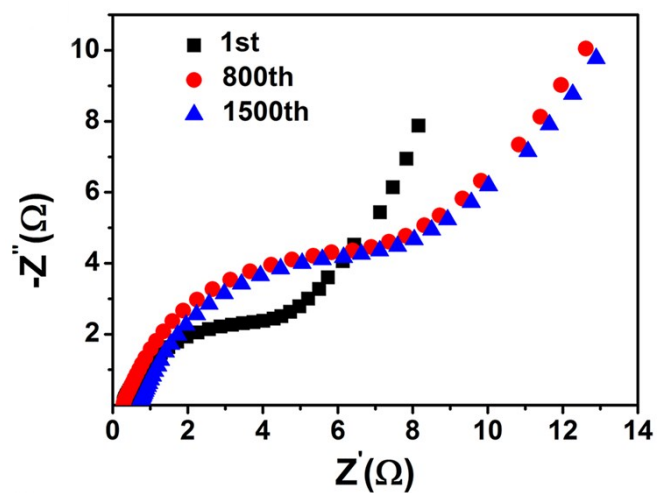

Figure S2. Impedance Nyquist plots of the  $\text{CuCo}_2\text{O}_4$  network electrode before and after 1500 cycles at open circuit potential.

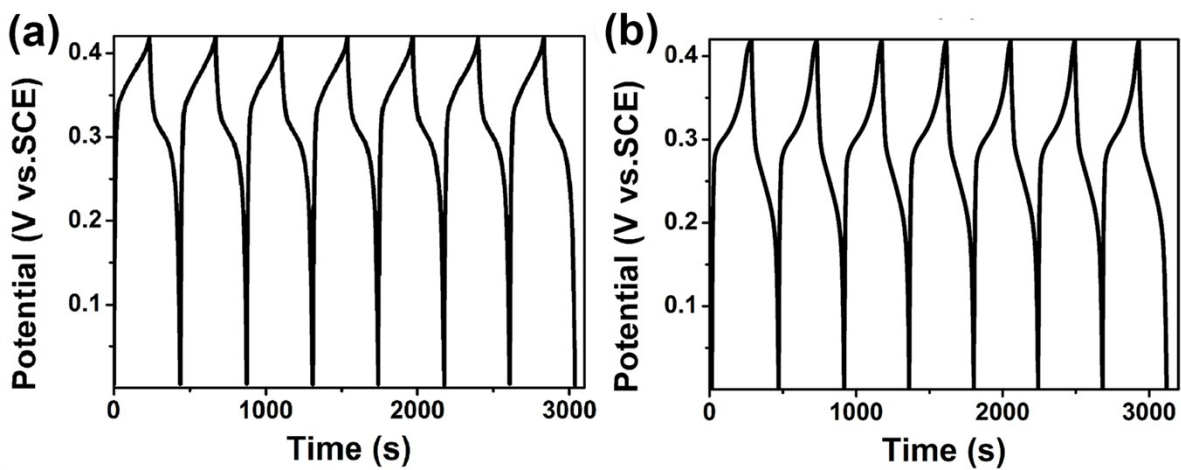

Figure S3. The first and last seven cycles.
